# Supplementary material for: A blood atlas of COVID-19 defines hallmarks of disease severity and specificity
Source: Cell. 2022 Mar 3;185(5):916–938.e58. doi: 10.1016/j.cell.2022.01.012 (PMC8776501; doi:10.1016/j.cell.2022.01.012)
Supplement: Data S6: Gene expression analysis of CITE-seq data (principal component analysis, differential expression, and WGCNA parameters and modules), related to STAR Methods, Figure 3, and Table S3 [file mmc10.pdf]

## Data S6: Gene Expression Analysis of CITE-seq Data (Principal Component Analysis, Differential Expression and WGCNA Parameters and Modules), Related to STAR Methods, Figure 3 and Table S3

Related to **Figure 3**; the **STAR Methods**: [CITE-seq: PCA analysis](#), differential expression analysis and [WGCNA analysis](#); **Table S3**: Differential Expression and Pathway Enrichment for CITE-seq Data and **Key Resource**: CBD-KEY-CITESEQ-GEX-WGCNA.

### Table of Contents

|                                                                                                                                                                                                                     |           |
|---------------------------------------------------------------------------------------------------------------------------------------------------------------------------------------------------------------------|-----------|
| <b>Principal Components Analysis .....</b>                                                                                                                                                                          | <b>2</b>  |
| 1: The first two principal components of pseudobulk gene expression for each of the major subsets.....                                                                                                              | 2         |
| 2: Association with source and COVID-19 severity for each of the first 10 PCs in each cluster, grouped by minor subset, major subset and cell type .....                                                            | 3         |
| 3: Association of principle components with clinical within hospitalized patients.....                                                                                                                              | 4         |
| 4: UMAP plots of gene expression, based on combining PCs across all clusters at the minor subset, major subset or cell type levels.....                                                                             | 5         |
| <b>Differential Expression Analysis .....</b>                                                                                                                                                                       | <b>6</b>  |
| 5: Numbers of differentially expressed genes for different contrasts by cell cluster, colored by cell type .....                                                                                                    | 6         |
| 6: Volcano plots of differential expression for critical COVID-19 vs healthy controls for each of the major subsets.....                                                                                            | 7         |
| 7: Relationship between mean abundance of minor subsets (i.e. the proportion of all cells that belong to this subset across all samples) and number of differentially expressed genes for a range of contrasts..... | 8         |
| 8: Relationship between differential abundance (measured by log-fold change in cell frequency between the two contrasts) and number of differentially expressed genes for each minor subset .....                   | 9         |
| <b>WGCNA Parameters and Modules .....</b>                                                                                                                                                                           | <b>10</b> |
| 9: Parameter settings for CITE-seq WGCNA analysis .....                                                                                                                                                             | 10        |
| 10: WGCNA modules identified for each “major cell type” analysed .....                                                                                                                                              | 11        |

# Principal Components Analysis

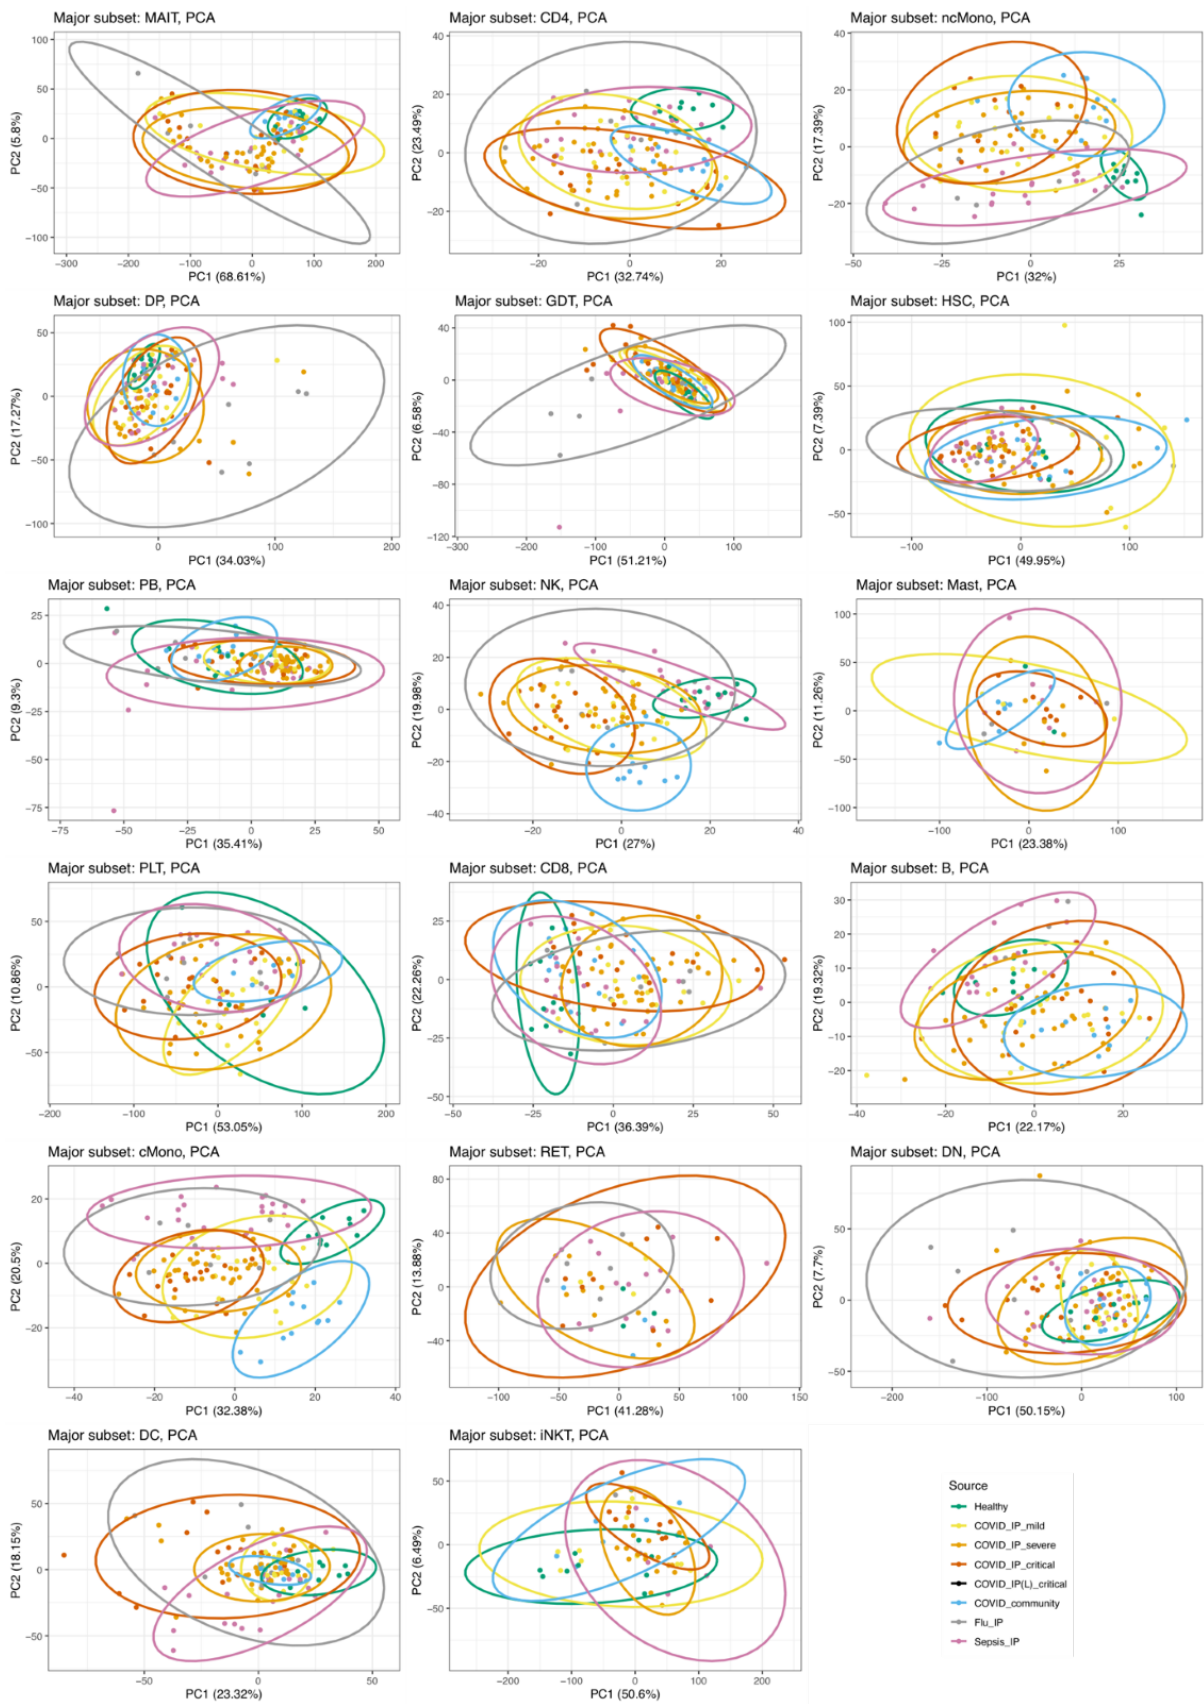

1: The first two principal components of pseudobulk gene expression for each of the major subsets, colored by sample source. Related to STAR Methods: CITE-seq: PCA analysis.

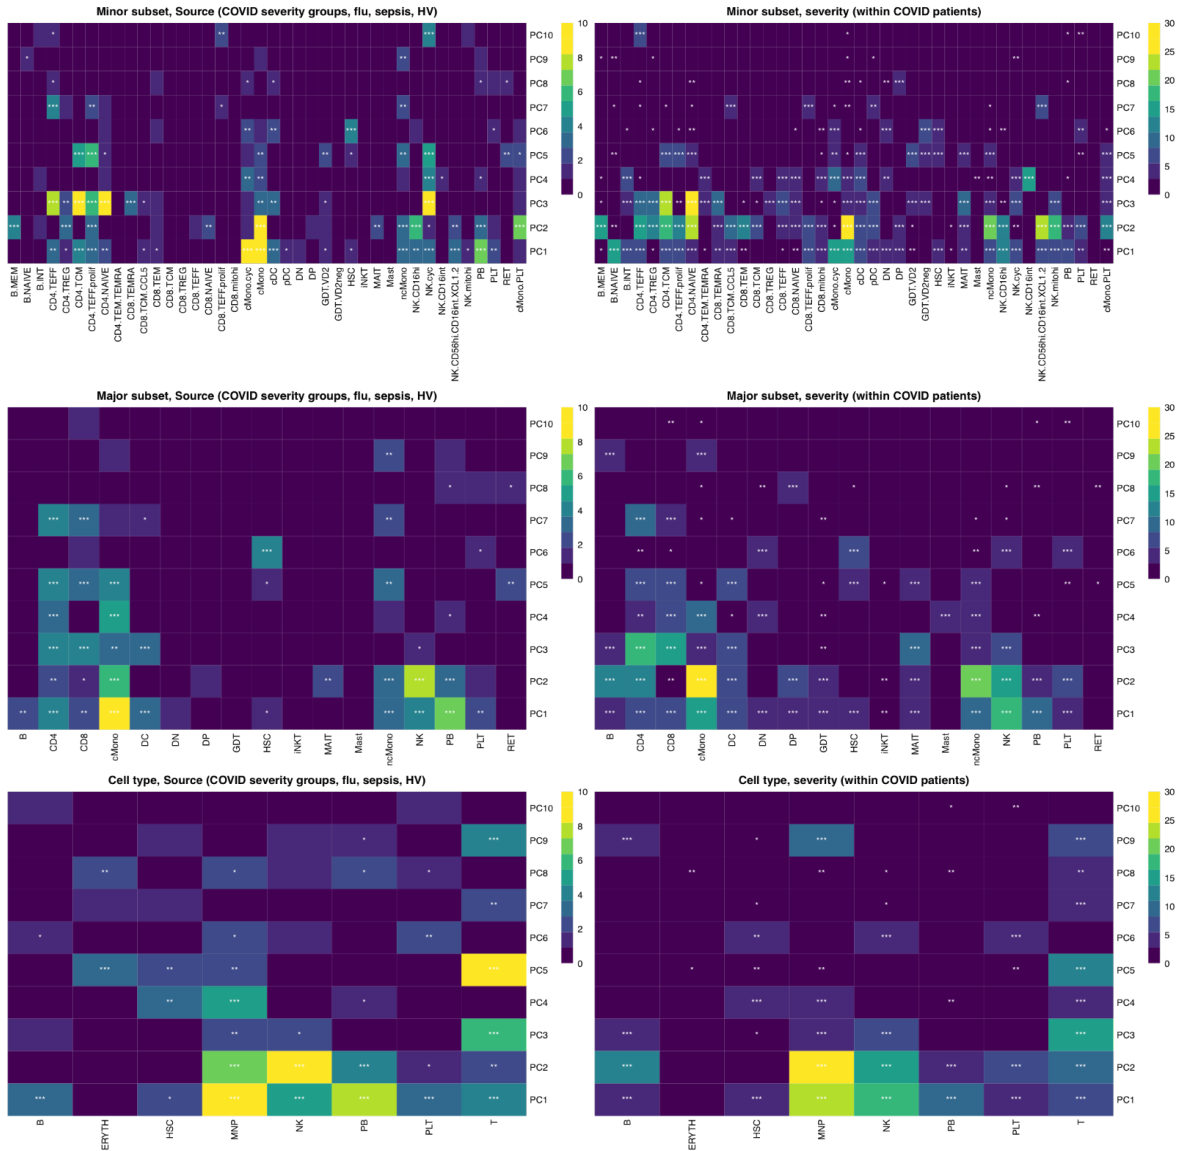

2: Association with source and COVID-19 severity for each of the first 10 PCs in each cluster, grouped by minor subset, major subset and cell type. The color shows the  $-\log_{10}$  transformation of the Benjamini-Hochberg corrected omnibus p-value, capped at 10 (for Source) and 30 (for severity). \*\*\*  $p < 0.001$ , \*\*  $p < 0.01$ , \*  $p < 0.05$ . Related to STAR Methods: CITE-seq: PCA analysis.

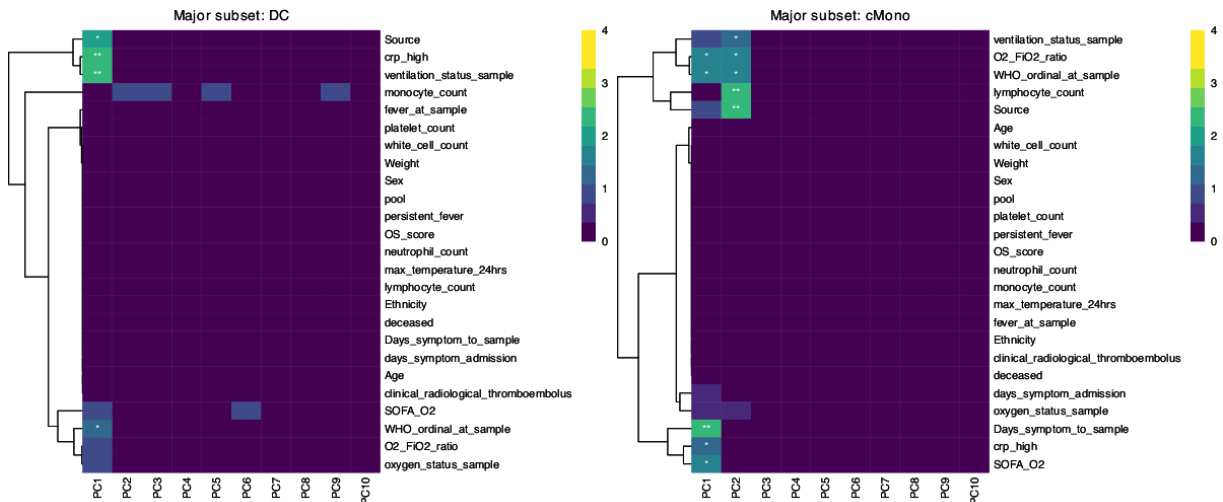

3: Association of principle components with clinical within hospitalized patients. The color shows the  $-\log_{10}$  transformation of the Benjamini-Hochberg corrected omnibus p-value. \*\*\*  $p < 0.001$ , \*\*  $p < 0.01$ , \*  $p < 0.05$ . Related to STAR Methods: CITE-seq: PCA analysis.

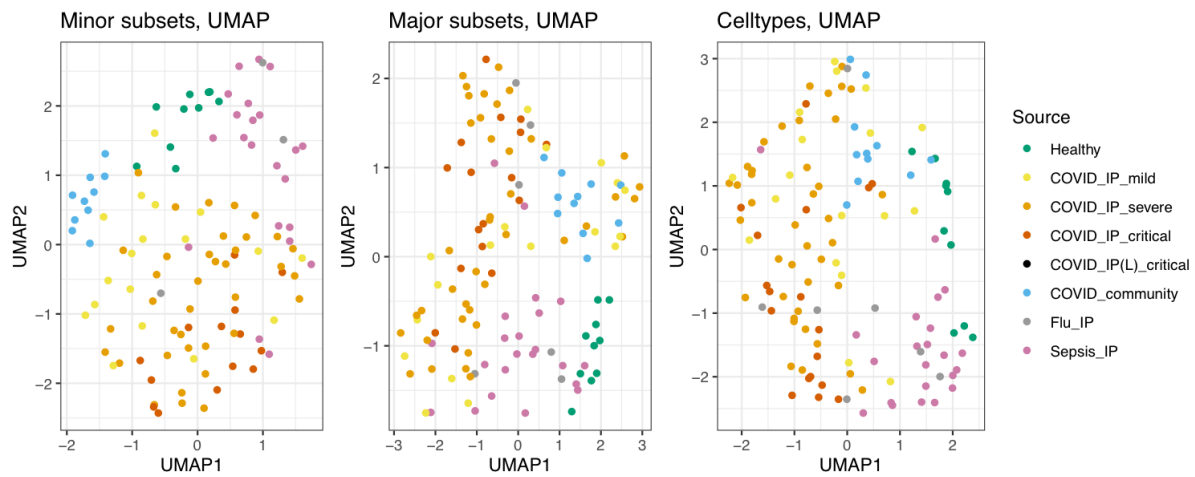

4: UMAP plots of gene expression, based on combining PCs across all clusters at the minor subset, major subset or cell type levels. Related to STAR Methods: CITE-seq: PCA analysis.

## Differential Expression Analysis

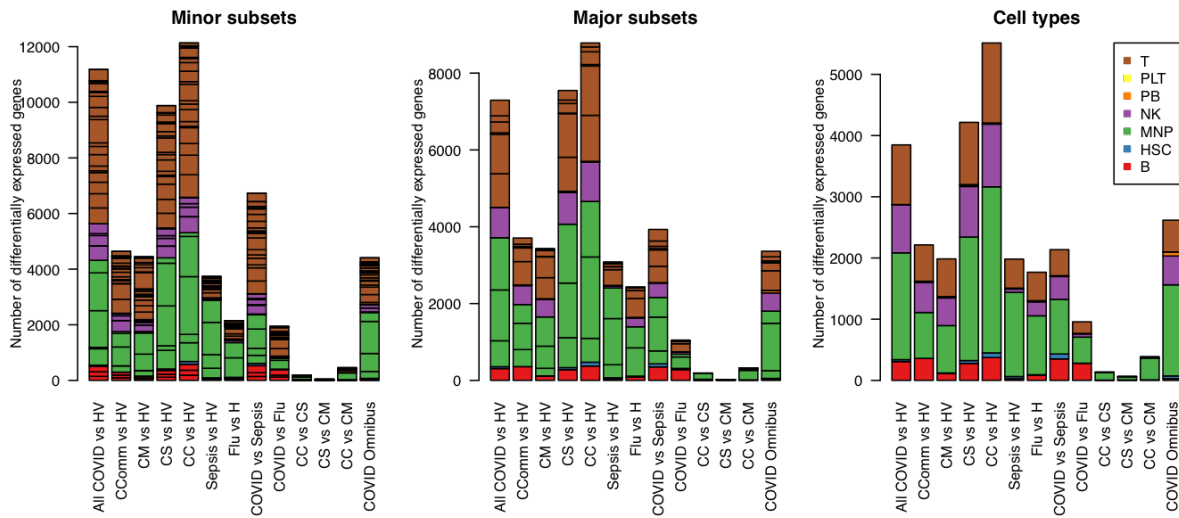

5: Numbers of differentially expressed genes for different contrasts by cell cluster, colored by cell type. The size of each individual rectangle gives the number of differentially expressed genes (FDR < 0.01, FC > 2) for a particular cell type for a given contrast, with cell types grouped and colored by cell lineage. Related to STAR Methods: CITE-seq: differential expression analysis.

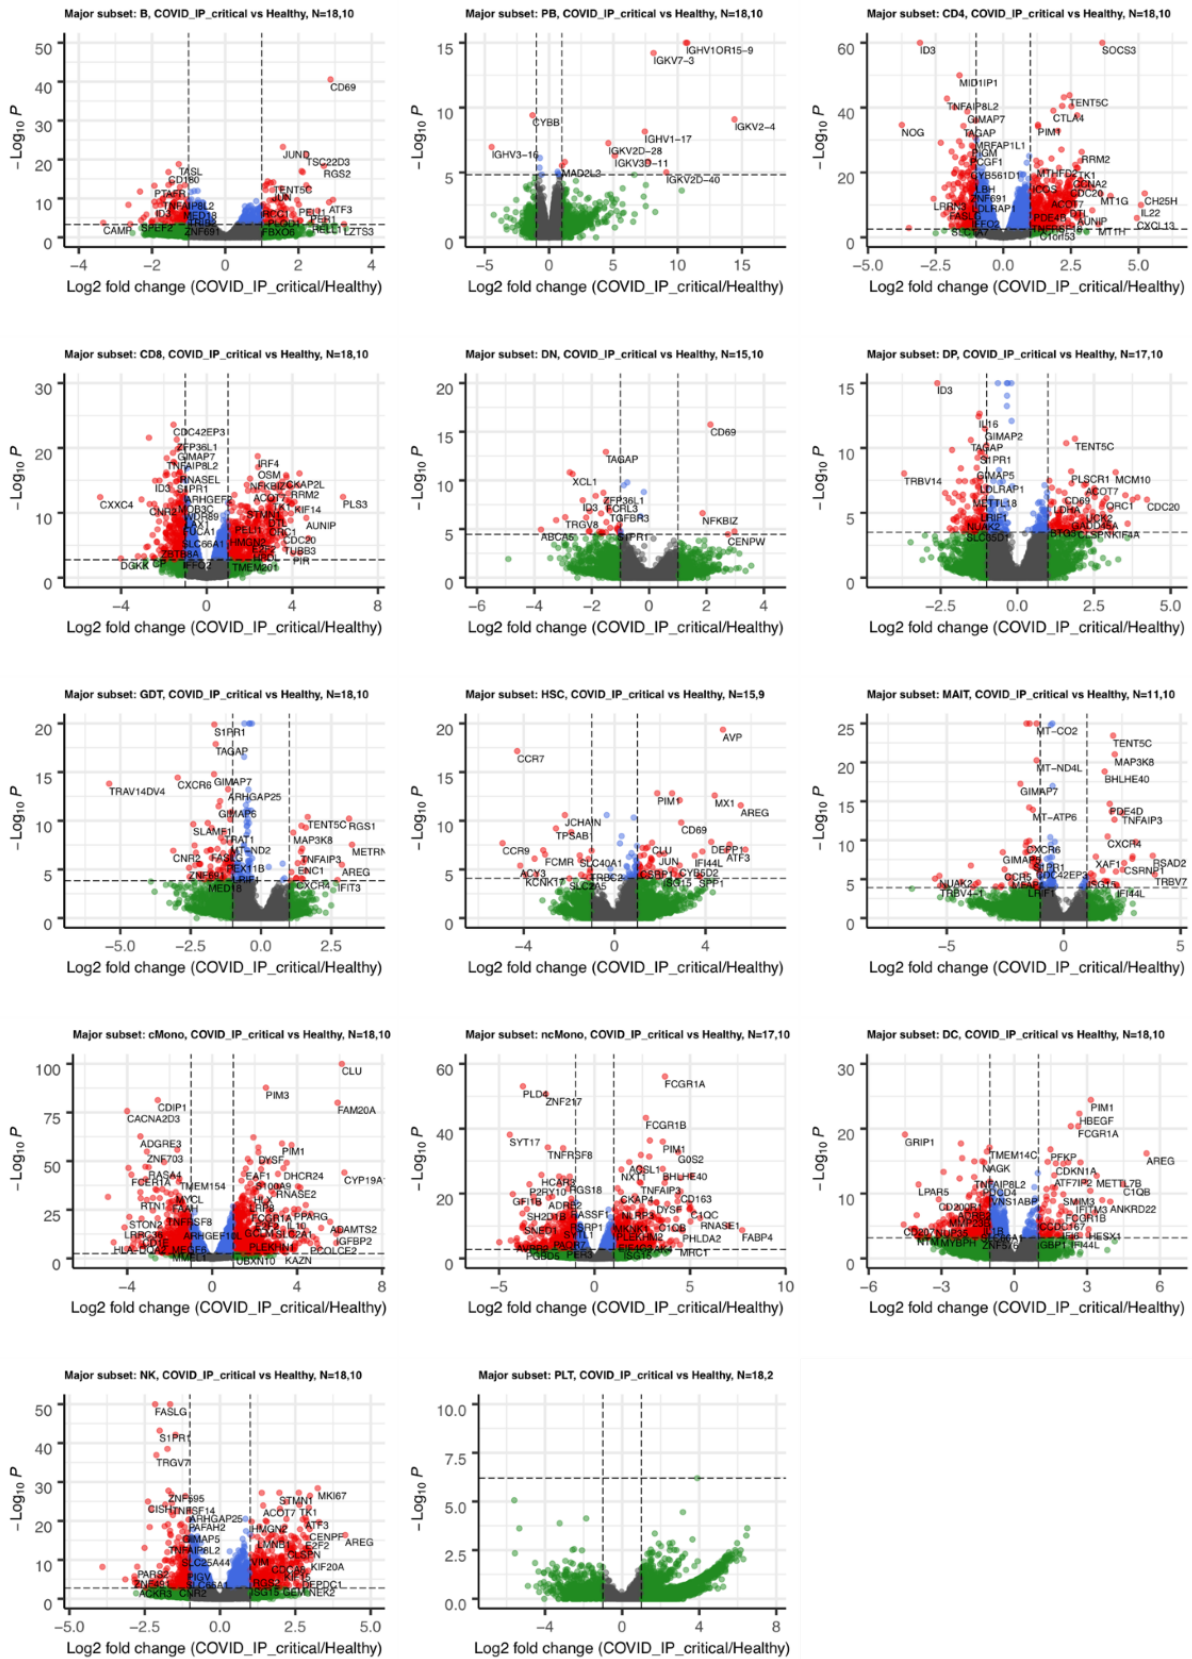

6: Volcano plots of differential expression for critical COVID-19 vs healthy controls for each of the major subsets. The N given in each title refers to the number COVID-19 patients and number of controls with a cell count high enough to be included in each analysis. Related to STAR Methods: CITE-seq: differential expression analysis.

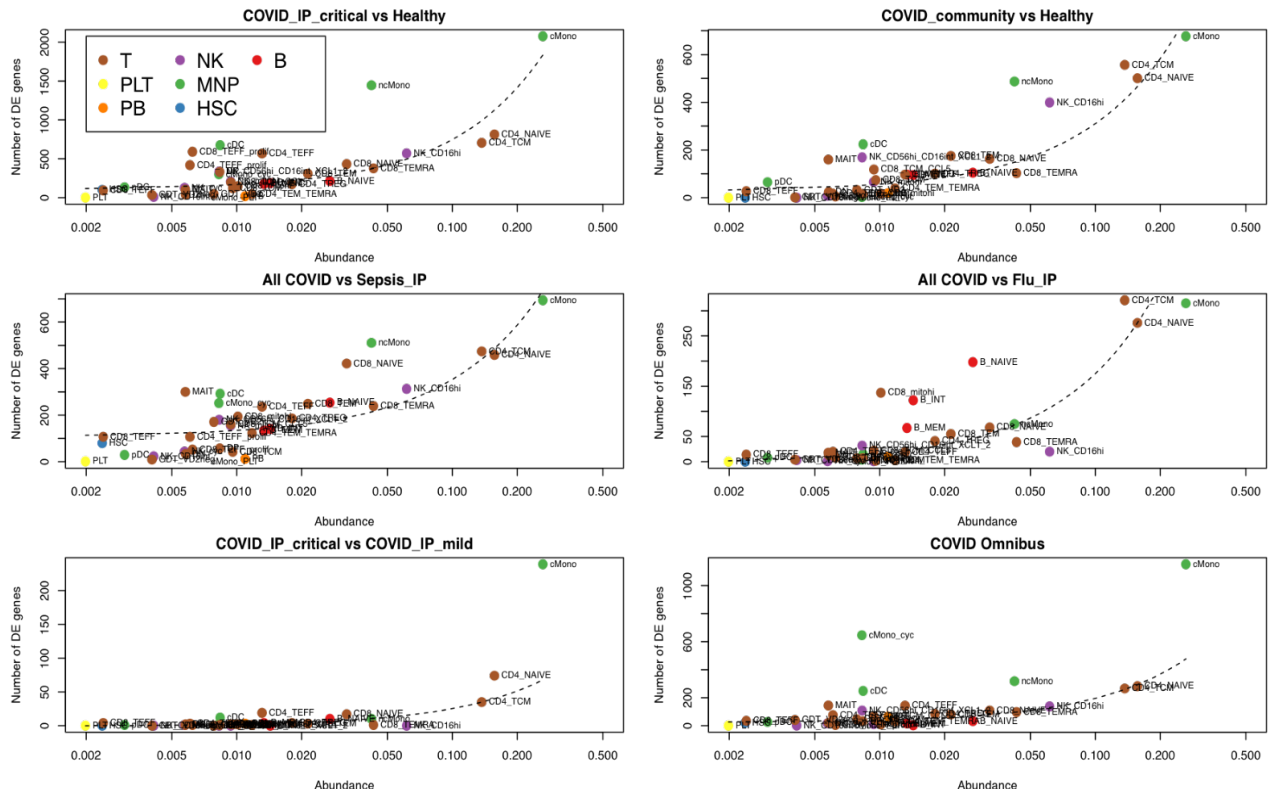

7: Relationship between mean abundance of minor subsets (i.e. the proportion of all cells that belong to this subset across all samples) and number of differentially expressed genes for a range of contrasts. Points are colored by cell type and labelled with the minor subset name. Related to STAR Methods: CITE-seq: differential expression analysis.

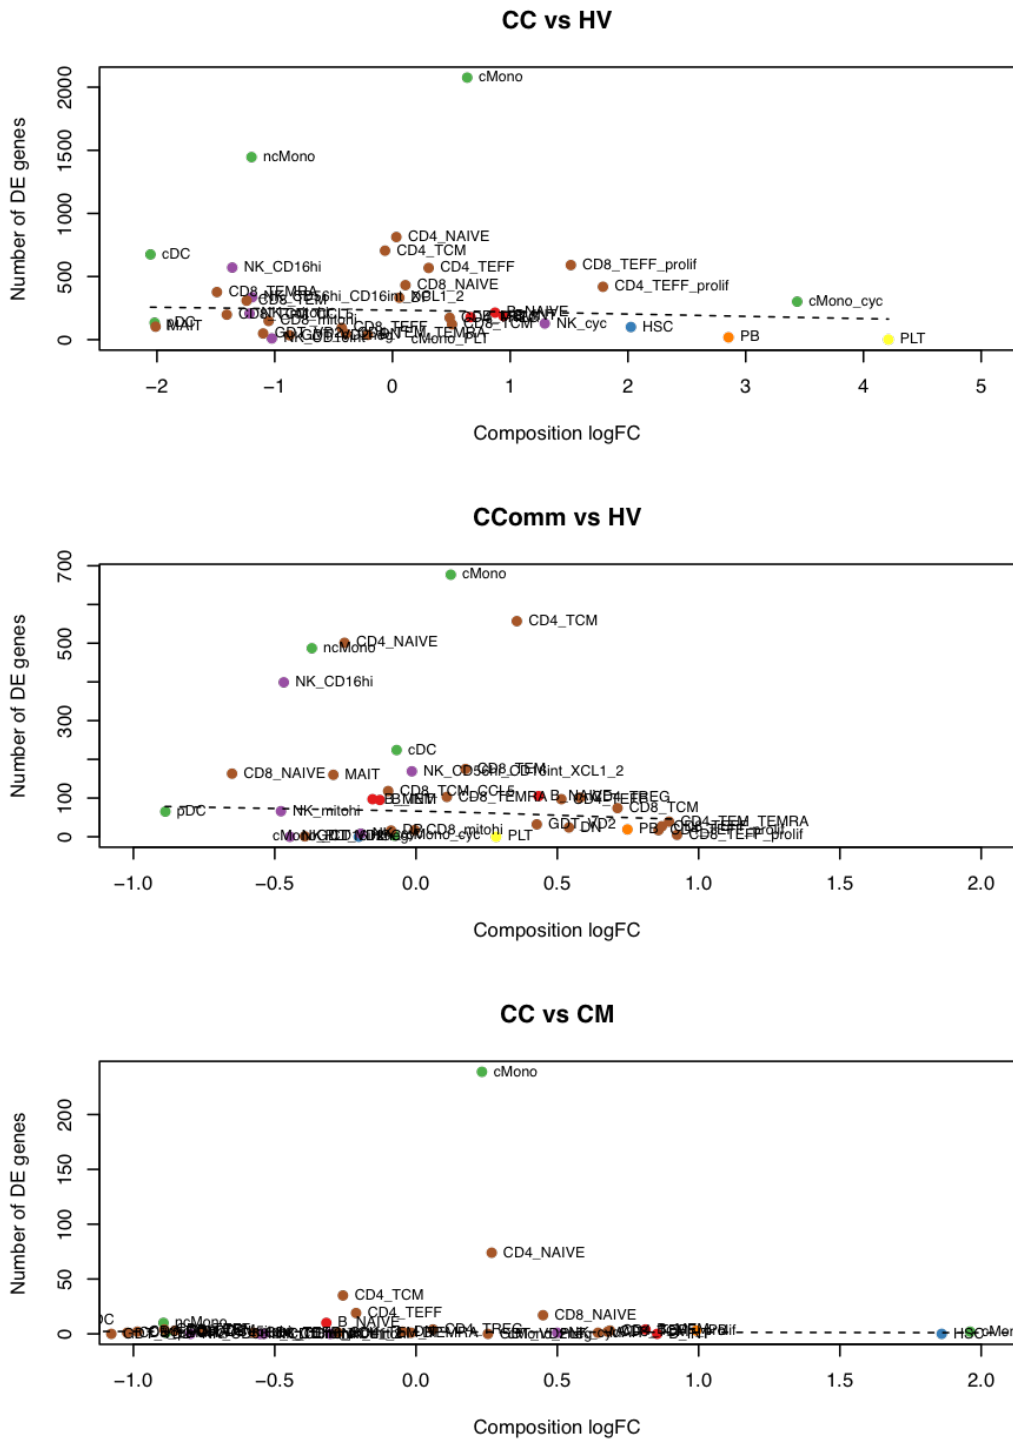

8: Relationship between differential abundance (measured by log-fold change in cell frequency between the two contrasts) and number of differentially expressed genes for each minor subset. Points are colored by cell type (using the same color scheme as Figure 42) and labelled with the minor subset name. Related to STAR Methods: CITE-seq: differential expression analysis.

## WGCNA Parameters and Modules

| WGCNA parameter                      | NK cells      | cMono         | ncMono        | PB            | B cells       | CD4 T cells   | CD8 T cells   |
|--------------------------------------|---------------|---------------|---------------|---------------|---------------|---------------|---------------|
| network type                         | signed hybrid |
| adjacency correlation function       | bicor         |
| adjacency distance function          | dist          |
| TOM type                             | signed        |
| minFraction (goodSamplesGenes)       | 0.5           | 0.5           | 0.5           | 0.5           | 0.5           | 0.5           | 0.5           |
| minNSamples (goodSamplesGenes)       | 4             | 4             | 4             | 4             | 4             | 4             | 4             |
| minNGenes (goodSamplesGenes)         | 4             | 4             | 4             | 4             | 4             | 4             | 4             |
| minRelativeWeight (goodSamplesGenes) | 0.1           | 0.1           | 0.1           | 0.1           | 0.1           | 0.1           | 0.1           |
| minSize (cutreeStatic)               | 10            | 10            | 10            | 10            | 10            | 10            | 10            |
| cutHeight (cutreeStatic)             | 125           | 100           | 200           | 156           | 200           | 100           | 120           |
| Soft power (adjacency)               | 3             | 6             | 4             | 5             | 4             | 6             | 6             |
| minimum module size (cutreeDynamic)  | 50            | 50            | 50            | 50            | 50            | 50            | 50            |

9: Parameter settings for CITE-seq WGCNA analysis

| major cell type | module color | assigned name    |
|-----------------|--------------|------------------|
| B cell          | cyan         | cycling          |
| B cell          | greenyellow  | ER_stress        |
| B cell          | purple       | IFN_resp         |
| B cell          | pink         | integrin_sig     |
| B cell          | turquoise    | IRF2.ZF-C2H2     |
| B cell          | green        | mature.B.cell    |
| B cell          | midnightblue | mito_translation |
| B cell          | black        | OxPhos           |
| B cell          | blue         | p38MAPK.AP1      |
| B cell          | magenta      | ribosomal        |
| B cell          | grey         | unassigned_genes |
| B cell          | brown        | wnt.notch        |
| CD4 T cell      | lightgreen   | ambient_rna      |
| CD4 T cell      | black        | cycling          |
| CD4 T cell      | pink         | IFN_resp         |
| CD4 T cell      | cyan         | integrin_sig     |
| CD4 T cell      | turquoise    | IRF2.ZF-C2H2     |
| CD4 T cell      | lightyellow  | JAK_STAT.IL_sig  |
| CD4 T cell      | green        | p38MAPK.AP1      |
| CD4 T cell      | midnightblue | ribosomal        |
| CD4 T cell      | grey         | unassigned_genes |
| CD8 T cell      | lightcyan    | ambient_rna      |
| CD8 T cell      | blue         | cycling          |
| CD8 T cell      | midnightblue | IFN_resp         |
| CD8 T cell      | yellow       | IRF2.ZF-C2H2     |
| CD8 T cell      | purple       | mito_translation |
| CD8 T cell      | pink         | NK_activation    |
| CD8 T cell      | black        | p38MAPK.AP1      |
| CD8 T cell      | magenta      | ribosomal        |
| CD8 T cell      | grey         | unassigned_genes |
| CD8 T cell      | cyan         | vesicle_loc      |
| cMono           | grey60       | cycling          |
| cMono           | lightgreen   | FKBP5.CD163      |
| cMono           | black        | IFN_resp         |
| cMono           | turquoise    | IRF2.ZF-C2H2     |
| cMono           | tan          | OxPhos           |
| cMono           | lightcyan    | p38MAPK.AP1      |
| cMono           | green        | ribosomal        |
| cMono           | grey         | unassigned_genes |
| ncMono          | yellow       | cell_adhesion    |
| ncMono          | greenyellow  | cell_growth      |
| ncMono          | blue         | Cilium.PECAM1    |
| ncMono          | black        | IC_Sig           |
| ncMono          | green        | IFN_resp         |
| ncMono          | pink         | IL-1_pathway     |
| ncMono          | purple       | IRF2.ZF-C2H2     |
| ncMono          | salmon       | OxPhos           |
| ncMono          | magenta      | p38MAPK.AP1      |
| ncMono          | brown        | ribosomal        |
| ncMono          | grey         | unassigned_genes |
| NK cell         | salmon       | ambient_rna      |
| NK cell         | blue         | cycling          |
| NK cell         | red          | ECM_organisation |
| NK cell         | purple       | IFN_resp         |
| NK cell         | turquoise    | IRF2.ZF-C2H2     |
| NK cell         | green        | ITK.STAT4        |
| NK cell         | tan          | leuk_prolif      |
| NK cell         | black        | mito_translation |
| NK cell         | brown        | p38MAPK.AP1      |
| NK cell         | greenyellow  | ribosomal        |
| PB              | turquoise    | cycling          |
| PB              | brown        | IFN_resp         |
| PB              | blue         | ribosomal        |
| PB              | grey         | unassigned_genes |

10: WGCNA modules identified for each “major cell type” analysed
